# Supplementary material for: Using strain-resolved analysis to identify contamination in metagenomics data
Source: PubMed Central journal article supplement (PMC9979413; doi:10.1186/s40168-023-01477-2), 2023-03-02

○ Samples extracted but *not sequenced*

● Zymo positive controls; extracted but not sequenced

● Well-to-well contaminated sample

● Samples extracted and sequenced

● Samples shared  $\geq 1$  strains

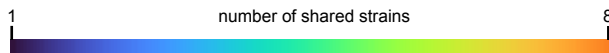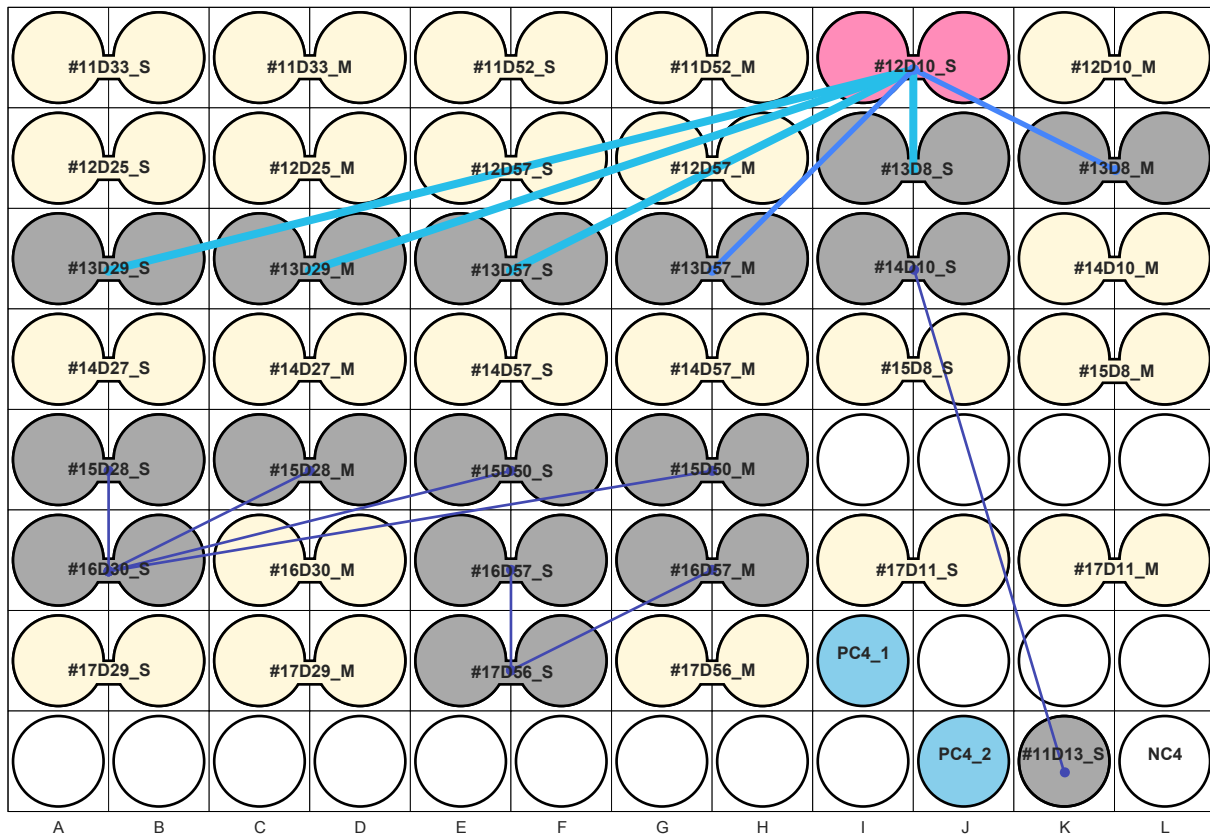

Supplement: 40168_2023_1477_MOESM2_ESM.pdf [file 40168_2023_1477_MOESM2_ESM.pdf]
